# Supplementary material
Source: Springer Nature journal article supplement (https://www.springermedizin.de/resource/supplementary/13019_2011_471_MOESM2_ESM.pdf/9638428)

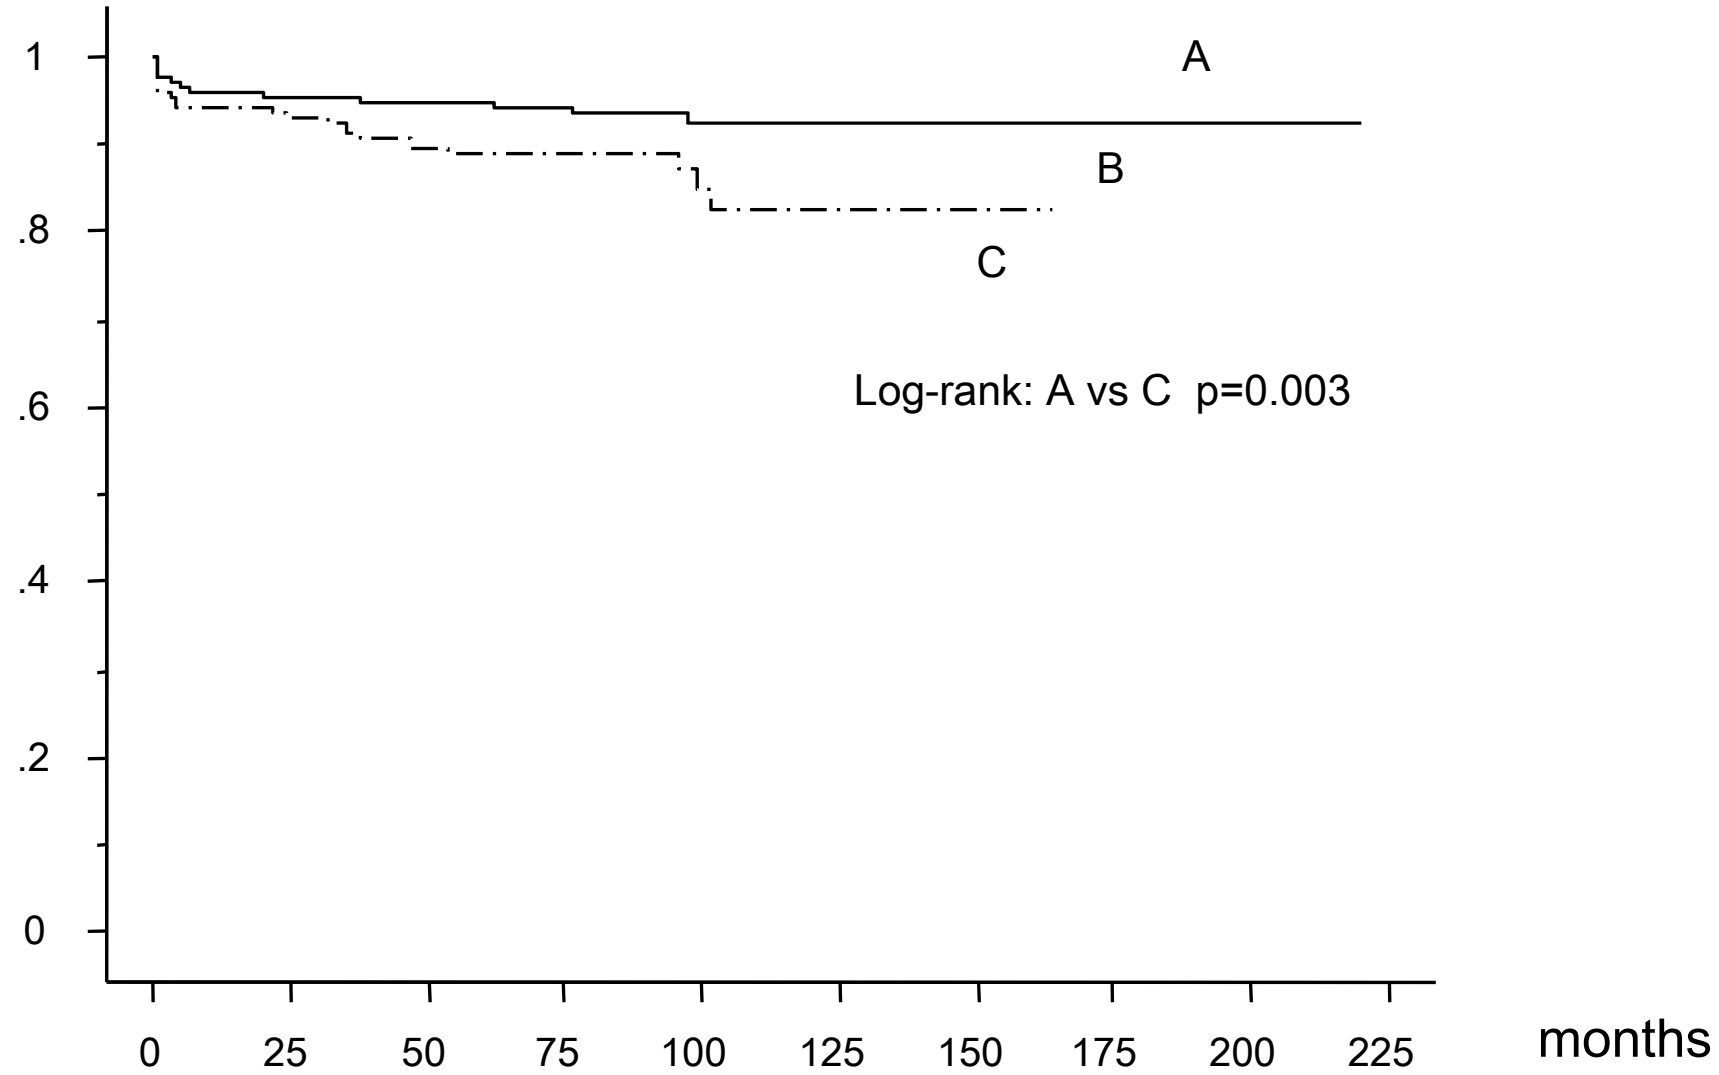

|   |     |     |    |    |
|---|-----|-----|----|----|
| A | 515 | 269 | 89 | 17 |
| B | 179 | 99  | 33 | 3  |
| C | 200 | 118 | 37 | 4  |

Supplement: MOESM2 [file 9638428]
